# Supplementary material for: Characterization of the Fecal and Mucosa-Associated Microbiota in Dogs with Chronic Inflammatory Enteropathy
Source: MDPI journal article supplement (doi:10.3390/ani13030326), 2023-01-17
Supplement: s1 [file s1]

**Table S1.** Signalment, epidemiological data and clinical scores of all dogs included in the study.

| Group  | Breed               | Age (y) | Sex | Weigh (kg) | BCS | Habitat | Living with other pets | CIBDAI | CCECAI | Sample |
|--------|---------------------|---------|-----|------------|-----|---------|------------------------|--------|--------|--------|
| HC-1   | Jack Russel         | 5.0     | fs  | 7.5        | 6/9 | Indoor  | Yes                    | 0      | 0      | F      |
| HC-2   | Mixed breed         | 1.5     | fs  | 11.7       | 5/9 | Outdoor | Yes                    | 0      | 0      | F      |
| HC-3   | Greyhound           | 2.0     | mn  | 25         | 6/9 | Outdoor | Yes                    | 0      | 0      | F      |
| HC-4   | Mixed breed         | 2.8     | f   | 14         | 5/9 | Indoor  | No                     | 0      | 0      | F+D    |
| HC-5   | Mixed breed         | 2.1     | mn  | 13.7       | 6/9 | Indoor  | No                     | 0      | 0      | F+D    |
| HC-6   | Maltese Bichon      | 5.0     | m   | 4.5        | 5/9 | Indoor  | No                     | 0      | 0      | F+D    |
| HC-7   | WHWT                | 11.0    | mn  | 8.2        | 7/9 | Indoor  | No                     | 0      | 0      | F      |
| HC-8   | Mixed breed         | 7.0     | fs  | 4.9        | 6/9 | Outdoor | Yes                    | 0      | 0      | F      |
| HC-9   | Greyhound           | 4.0     | mn  | 22         | 5/9 | Indoor  | Yes                    | 0      | 0      | F+D    |
| HC-10  | Beagle              | 9.0     | m   | 16.1       | 5/9 | Indoor  | Yes                    | 0      | 0      | F+D    |
| HC-11  | English Setter      | 5.6     | fs  | 15.7       | 5/9 | Indoor  | Yes                    | 0      | 0      | F+D    |
| HC-12  | Mixed breed         | 8.8     | m   | 32.8       | 6/9 | Outdoor | No                     | 0      | 0      | F+D    |
| IBD-1  | Pyrenean Mountain   | 2.3     | m   | 44         | 3/9 | 50/50   | No                     | 7      | 8      | F      |
| IBD-2  | Mixed breed         | 6.9     | mn  | 11.8       | 5/9 | Indoor  | No                     | 8      | 8      | F+D    |
| IBD-3  | Miniature Schnauzer | 3.8     | mn  | 8.4        | 7/9 | Indoor  | No                     | 4      | 6      | F      |
| IBD-4  | Boston Terrier      | 3.8     | m   | 10.5       | 4/9 | Indoor  | Yes                    | 9      | 9      | F      |
| IBD-5  | Mixed breed         | 12.0    | fs  | 6.4        | 4/9 | Outdoor | Yes                    | 7      | 10     | F      |
| IBD-6  | Border Collie       | 1.9     | f   | 14.6       | 4/9 | Indoor  | No                     | 6      | 7      | F+D    |
| IBD-7  | Maltese Bichon      | 11.0    | m   | 4.4        | 4/9 | Indoor  | No                     | 4      | 5      | F+D    |
| IBD-8  | GSD                 | 4.4     | f   | 29         | 3/9 | 50/50   | Yes                    | 6      | 6      | F+D    |
| IBD-9  | Mixed breed         | 10.6    | fs  | 6.8        | 5/9 | Indoor  | No                     | 6      | 7      | F+D    |
| IBD-10 | Maltese Bichon      | 5.8     | fs  | 4.6        | 4/9 | Indoor  | No                     | 8      | 8      | F+D    |
| IBD-11 | Mixed breed         | 3.8     | fs  | 21.4       | 4/9 | Indoor  | No                     | 5      | 7      | F+D    |
| IBD-12 | Golden Retriever    | 4.3     | fs  | 23.5       | 6/9 | Indoor  | No                     | 3      | 3      | F+D    |
| IBD-13 | Yorkshire Terrier   | 11.0    | fs  | 5          | 6/9 | Indoor  | No                     | 7      | 8      | F+D    |
| IBD-14 | Mixed breed         | 3.8     | mn  | 33         | 5/9 | Indoor  | No                     | 5      | 5      | F+D    |
| IBD-15 | Golden Retriever    | 2.1     | f   | 36.6       | 6/9 | Indoor  | No                     | 6      | 8      | F+D    |
| IBD-16 | Bichon Frise        | 11.8    | fs  | 2.3        | 5/9 | Indoor  | No                     | 8      | 10     | F+D    |
| IBD-17 | Fox Terrier         | 11.3    | m   | 8          | 4/9 | Outdoor | No                     | 3      | 5      | F+D    |
| IBD-18 | Chihuahua           | 1.9     | fs  | 3.5        | 5/9 | Indoor  | No                     | 8      | 8      | F+D    |
| IBD-19 | Maltese Bichon      | 4.4     | fs  | 3.7        | 4/9 | Indoor  | Yes                    | 7      | 7      | F+D    |
| IBD-20 | Mixed breed         | 2.1     | f   | 4.3        | 4/9 | Indoor  | No                     | 7      | 7      | F+D    |
| IBD-21 | Catalan Shepherd    | 6.5     | fs  | 17         | 3/9 | Indoor  | No                     | 7      | 9      | F+D    |
| IBD-22 | GSD                 | 6.5     | fs  | 19.2       | 2/9 | Indoor  | Yes                    | 8      | 10     | F+D    |
| IBD-23 | Rottweiler          | 5.4     | mn  | 37.5       | 4/9 | 50/50   | No                     | 4      | 5      | F+D    |
| IBD-24 | French Bulldog      | 7.1     | m   | 12.4       | 5/9 | Indoor  | No                     | 7      | 9      | F+D    |
| IBD-25 | Yorkshire Terrier   | 11.2    | m   | 3.4        | 3/9 | 50/50   | No                     | 5      | 7      | F+D    |
| IBD-26 | Mixed breed         | 1.5     | m   | 18.4       | 3/9 | Indoor  | No                     | 7      | 7      | F+D    |
| IBD-27 | Mixed breed         | 3.9     | m   | 37         | 4/9 | 50/50   | Yes                    | 6      | 7      | F+D    |
| IBD-28 | Beagle              | 9.5     | fs  | 11.8       | 4/9 | Indoor  | Yes                    | 5      | 6      | F+D    |
| IBD-29 | Greyhound           | 10.4    | fs  | 20.8       | 3/9 | 50/50   | Yes                    | 6      | 7      | F+D    |
| IBD-30 | Yorkshire Terrier   | 5.1     | fs  | 4.5        | 4/9 | Indoor  | No                     | 10     | 12     | F+D    |
| IBD-31 | Mixed breed         | 6.7     | mn  | 32.4       | 6/9 | 50/50   | Yes                    | 6      | 7      | F+D    |
| IBD-32 | Mixed breed         | 2.3     | fs  | 8.7        | 4/9 | Indoor  | Yes                    | 6      | 7      | F+D    |
| IBD-33 | Pomeranian          | 8.6     | mn  | 5.7        | 4/9 | Indoor  | No                     | 7      | 8      | F+D    |
| IBD-34 | Belgian Malinois    | 1.9     | m   | 27.8       | 3/9 | Indoor  | No                     | 8      | 8      | F+D    |

The canine IBD activity index (CIBDAI) and the canine chronic enteropathy activity index (CCECAI) refers to the clinical activity score at the first visit. BCS, Body condition score; D, duodenal biopsies; F, fecal sample used for microbiota characterization; f, female entire; GSD, German shepherd dog; HC, healthy control; IBD, inflammatory bowel disease; m, male entire; n, neutered; s, spayed; Habitat refers to the area living most part of the day; WHWT, West Highland White Terrier.
